# Supplementary material for: Cross-Equatorial Climate Linkages: Insights into Monsoon–Glaciation–Insolation Dynamics from Bakhira Lake Sediments, Ganga Plain, India
Source: Research Square preprint supplement (doi:10.21203/rs.3.rs-7601905/v1), 2025-10-17
Supplement: Supplementary file 1 [file 129e6b8ca6583538961ee87c.xlsx]

## Sheet: Supp_1 (14C_AMS)
Supplementary Table 1. AMS 14C dates of the sediment samples from Bakhira Lake, Sant Kabir Nagar, Uttar Pradesh
SI.No	Sample Id	pMC value	Depth(cm)	Radiocarbon age (BP)	Calibrated age(BP)
1	IUACD#24C7008	64.228±0.263	30	3556±32	3837.5
2	IUACD#24C7011	42.180±1.184	84	6934±228	7794.5
3	IUACD#24C7012	33.029±0.156	124	8898±38	9973
4	IUACD#24C7013	18.286±0.156	156	13648±68	16551.5
5	IUACD#24C7014	17.687±0.126	180	13916±57	16902.5
6	IUACD#24C7017	11.178±0.101	288	17602±73	21335.5
7	IUACD#24C7019	9.884±0.0835	356	18590±68	22612.5
* AMS 14C measurements were carried out at the IUAC, India.
The 14C ages were calibrated to calendar years before present (cal yr BP) using OxCal v4.4 and IntCal20 dataset (Reimer et al. 2013).

## Sheet: Supp_2 (Major element)
Supplementary Table 2. Major element compositions of Bakhira Lake sediment in weight percent.
Sample ID	Depth (cm)	Age (kyr)	SiO2	Al2O3	TiO2	Fe2O3	MnO	MgO	CaO	Na2O	K2O	P2O5	LOI	CIA	αAlNa
BKHT-1	2	0.255834	64.5497	18.2704	0.707604	3.35588	0.0841096	1.10449	0.344907	1.1346	3.73495	0.204161	5.1	73.6455	4.79283
BKHT-5	10	1.27917	64.9085	17.5209	0.665166	3.01805	0.0772849	1.02841	0.345716	1.12072	3.6574	0.198765	6.2	73.1449	4.65316
BKHT-8	16	2.04667	62.0558	13.6962	0.611073	1.97695	0.0636187	0.71122	0.341274	1.21398	3.028	0.142591	16.2	69.9041	3.35798
BKHT-10	20	2.55834	65.3091	15.7714	0.622729	2.68023	0.0704602	0.952332	0.346524	1.10684	3.57984	0.19337	7.5	71.3675	4.24108
BKHT-12	24	3.07001	62.0662	14.1335	0.630204	1.95416	0.0720041	0.675151	0.430176	1.31241	2.84656	0.136086	15	70.1161	3.20531
BKHT-14	28	3.58168	62.2922	14.6889	0.646215	2.25223	0.0680887	0.782049	0.373026	1.21119	3.03442	0.145229	13.25	71.1476	3.60965
BKHT-15	30	3.83751	62.8437	18.4702	0.702264	2.36019	0.0614298	0.97995	0.28202	1.11049	3.61919	0.124463	11.2	74.6906	4.95047
BKHT-20	40	4.57028	62.7581	14.433	0.575572	1.97266	0.0510505	0.798876	0.222727	0.884553	2.94544	0.10819	14.4	74.0813	4.85649
BKHT-25	50	5.30306	62.6924	15.05	0.647287	2.24018	0.0573324	0.915952	0.23918	0.945122	3.25793	0.128074	13.1	73.1734	4.73956
BKHT-30	60	6.03584	62.1948	16.203	0.717123	2.25452	0.0588593	0.955116	0.257425	1.03677	3.57944	0.128957	11.5	72.8137	4.65161
BKHT-35	70	6.76862	62.9083	13.7671	0.584847	2.03371	0.0543347	0.834339	0.243075	0.933129	3.11358	0.108594	15.2	72.0196	4.39125
BKHT-40	80	7.5014	62.5182	15.2443	0.662227	2.5503	0.0641734	0.888947	0.315876	1.10997	3.22228	0.154372	11.5	72.1316	4.08774
BKHT-45	90	8.12128	61.8683	12.8281	0.578613	1.79247	0.0497961	0.69038	0.280098	0.954941	2.65305	0.119189	18.2	72.1437	3.99829
BKHT-50	100	8.66591	62.1873	12.1391	0.537489	1.77136	0.0494864	0.670057	0.282278	0.952161	2.60649	0.111282	17.6	71.2334	3.79458
BKHT-55	110	9.21054	61.7311	11.689	0.531471	1.55332	0.0491332	0.612133	0.300397	1.00457	2.57699	0.112154	20.1	70.0846	3.46328
BKHT-60	120	9.75517	65.1255	11.6604	0.437381	1.60644	0.0570544	0.597646	0.361948	1.19941	2.62609	0.110048	17.3	68.0483	2.89358
BKHT-65	130	11.2065	64.1625	12.094	0.478636	1.6301	0.057022	0.622042	0.346279	1.17026	2.75102	0.0995629	15.1	68.6071	3.07591
BKHT-66	132	11.6176	66.0242	13.9897	0.499319	1.89817	0.0584004	0.774477	0.31999	1.11689	3.11386	0.108624	10.5	70.7234	3.72811
BKHT-67	134	12.0288	62.0074	13.0307	0.583014	1.74277	0.0514283	0.714979	0.28822	1.03294	2.83202	0.109191	16.4	71.1251	3.75474
BKHT-69	138	12.8511	61.7913	16.1922	0.733636	2.43183	0.0634816	0.948557	0.256177	1.04675	3.43698	0.160752	11.2	73.2619	4.60418
BKHT-70	140	13.2622	63.0414	18.65	0.786294	2.91358	0.0722151	1.17465	0.231202	1.04212	3.88449	0.175246	7.9	74.6265	5.32658
BKHT-72	144	14.0846	66.6696	11.9212	0.410617	1.54015	0.0560401	0.745656	0.342516	1.05036	2.1469	0.105685	16.1	71.8281	3.37811
BKHT-73	146	14.4957	63.2449	12.8133	0.536499	1.74655	0.0566937	0.685253	0.337462	1.15371	2.88135	0.107196	15	69.4674	3.30561
BKHT-74	148	14.9069	62.3274	13.5326	0.594362	1.863	0.0563655	0.748465	0.328644	1.13716	3.01167	0.114829	14.9	70.2547	3.54199
BKHT-75	150	15.318	62.783	11.588	0.495813	1.4959	0.0507711	0.587514	0.319629	1.0572	2.62803	0.100419	17.2	69.1645	3.26242
BKHT-80	160	16.61	63.5817	12.4701	0.509895	1.82095	0.0564533	0.687903	0.336224	1.12858	2.7976	0.115819	16.1	69.4034	3.28871
BKHT-85	170	16.7563	62.8333	12.6758	0.5408	1.84349	0.0569967	0.7105	0.320462	1.13334	2.88105	0.111442	15.3	69.4839	3.32892
BKHT-90	180	16.9025	63.7776	14.5179	0.465792	1.68747	0.0579362	0.620461	0.330503	1.14335	2.63841	0.101337	16.8	73.1127	3.77934
BKHT-95	190	17.313	62.8949	14.834	0.630654	2.28585	0.0685856	0.892695	0.308608	1.13954	3.15491	0.145739	14.7	71.7097	3.87453
BKHT-100	200	17.7234	62.4454	17.4211	0.759965	2.6727	0.0678484	1.0616	0.24369	1.04444	3.66074	0.167999	7.2	73.9861	4.96458
BKHT-105	210	18.1339	62.8393	12.4454	0.530784	1.82472	0.0588218	0.69455	0.323654	1.11114	2.80502	0.10701	17.1	69.5298	3.3337
BKHT-110	220	18.5443	63.4656	12.6733	0.521611	1.79405	0.0553796	0.680526	0.300592	1.06036	2.76965	0.117239	15.2	70.5504	3.55733
BKHT-115	230	18.9548	62.3435	13.3253	0.584716	1.86974	0.0585803	0.715034	0.316652	1.12564	2.95007	0.114109	16.1	70.3277	3.52344
BKHT-125	250	19.7757	62.7567	13.1648	0.564124	1.83365	0.0624159	0.655583	0.352489	1.13998	2.69927	0.119413	15.1	70.7626	3.43719
BKHT-130	260	20.1862	62.6817	13.5853	0.584648	2.06516	0.0641118	0.748875	0.323139	1.03309	2.77165	0.13581	14.9	71.9797	3.91398
BKHT-145	290	21.3731	62.1024	10.5454	0.469228	1.46938	0.0520405	0.553464	0.312071	0.998412	2.37739	0.10207	21.5	68.7903	3.14372
BKHT-150	300	21.5608	63.1305	8.23406	0.345399	1.25313	0.05445	0.450757	0.308106	1.0197	1.93178	0.0819863	19.5	65.5382	2.40343
BKHT-155	310	21.7486	64.1236	13.2713	0.526375	2.07921	0.0614142	0.760941	0.302138	1.11753	2.94536	0.13306	15.5	70.41	3.53461
BKHT-160	320	21.9364	62.4905	13.0198	0.566496	2.10778	0.0631203	0.741168	0.290721	1.08752	2.88598	0.139366	17.2	70.5196	3.56333
BKHT-170	340	22.312	62.3555	13.6153	0.597027	1.91369	0.0601571	0.733893	0.323126	1.17984	2.9727	0.141883	15.1	70.3164	3.43473
BKHT-175	350	22.4998	62.4904	14.325	0.623288	2.27726	0.0754173	0.783785	0.395391	1.33389	3.11271	0.163729	12.2	69.5083	3.19642
BKHT-185	370	22.8754	62.2453	10.0844	0.445022	1.30959	0.0484758	0.499758	0.307249	1.03444	2.30687	0.0929114	21.5	67.9408	2.90159
BKHT-200	400	23.4387	62.1622	12.6247	0.471121	1.47737	0.0612545	0.551236	0.353291	1.2518	2.45838	0.101403	17.2	70.1816	3.00176

## Sheet: Supp_3 (REEs & Trace elements)
Supplementary Table 3. Trace element .and Rare Earth elementcompositions of Bakhira Lake sediments in ppm.
Sample Id	Depth (cm)	Age (kyr)	Sc	V	Cr	Co	Ni	Cu	Zn	Ga	Rb	Sr	Y	Zr	Nb	Mo	Cd	Cs	Ba	Hf	Pb	La	Th	U	Th/U	Rb/Sr	La/Sc	Th/Sc	Cr/Th	Th/Co	La/Co	Y/Ni	Cr/V	Eu/Eu*	Cr/Ni	La	Ce	Pr	Nd	Sm	Eu	Gd	Tb	Dy	Ho	Er	Tm	Yb	Lu
BKHT-1	2	0.255834	15.5078	162.128	118.073	24.2636	89.3251	96.6143	198.881	20.4981	191.367	64.0089	26.4533	340.394	8.92165	3.30063	0.0614696	12.8603	535.646	6.44135	13.683	37.2074	17.3805	2.06537	8.41523	2.98969	2.39927	1.12076	6.79342	4.29792	9.20078	0.740364	1.45654	0.637747	1.32184	37.2074	70.7762	8.38263	29.5736	4.56341	0.932897	4.38257	0.506731	2.69846	0.434547	1.29613	0.170725	1.36379	0.228477
BKHT-5	10	1.27917	16.1595	162.372	118.834	24.2636	80.2572	81.535	166.956	22.8043	191.191	62.9462	26.9205	335.66	9.01588	2.23279	0.102449	13.532	519.467	6.65792	13.8018	38.9321	18.071	2.03293	8.88917	3.03738	2.40924	1.11829	6.57594	4.46867	9.62727	0.838569	1.46373	0.553595	1.48067	38.9321	71.5051	7.92191	28.7116	5.33223	0.922851	4.87098	0.490745	2.6777	0.483185	1.36801	0.159621	1.24039	0.182203
BKHT-8	16	2.04667	9.31756	100.487	130.655	13.6174	41.9976	31.2847	86.0255	15.2117	137.639	92.3859	24.7085	311.265	9.1691	0.679525	0.0604899	9.81029	519.958	4.85351	11.2672	39.2445	11.9045	1.44164	8.25764	1.48982	4.21188	1.27764	2.57507	5.24527	17.2916	1.47082	0.610128	0.578643	3.11101	39.2445	67.4429	8.17438	30.2923	5.41403	0.989201	5.04515	0.500336	2.58084	0.435331	1.29613	0.165174	1.30209	0.177864
BKHT-10	20	2.55834	14.1069	138.377	115.36	18.4782	59.8982	52.2372	118.926	22.8044	196.92	63.0951	25.0042	312.821	13.4276	1.40761	0.122939	13.5362	512.753	7.75909	12.9853	36.3001	12.0492	1.86477	6.46147	3.12101	2.57321	1.13768	7.1879	5.21128	11.7869	1.04361	1.66733	0.55556	1.92593	36.3001	68.8565	7.7919	28.2327	5.20136	0.930893	5.04508	0.484348	2.61196	0.459667	1.24102	0.177666	1.23068	0.164849
BKHT-12	24	3.07001	12.1194	180.528	62.0574	22.1342	72.5934	58.9716	122.363	22.0168	212.086	85.5249	29.2759	569.541	17.4722	1.33481	0.0704899	15.429	605.827	10.0682	13.7371	38.4873	11.8379	2.01769	5.86705	2.47981	3.17567	0.976771	5.24226	3.20895	10.4329	1.00821	0.687508	0.687295	0.854863	38.4873	71.0577	7.92446	28.527	4.86602	1.07767	4.72231	0.50433	2.9095	0.566336	1.6148	0.21098	1.77944	0.25306
BKHT-14	28	3.58168	13.8463	181.27	73.5834	27.9802	88.1555	62.9544	141.223	24.5758	216.316	78.7276	25.4997	543.334	19.8092	1.31054	0.122939	15.0911	585.83	9.49087	13.2767	35.6599	11.4374	1.75084	6.53252	2.74766	2.57541	0.826029	6.43356	2.45261	7.64682	0.723146	0.811866	0.564297	0.8347	35.6599	68.4153	7.28969	26.5289	4.93965	0.888665	4.69258	0.472362	2.45974	0.411804	1.3776	0.160316	1.3248	0.16919
BKHT-15	30	3.83751	13.2272	164.356	116.178	20.4066	64.6953	55.0933	122.56	21.7637	212.734	57.5306	25.7095	282.285	8.60558	1.65029	0.102449	12.5096	557.936	4.99788	13.5073	39.6906	16.0769	1.84422	8.71745	3.69776	3.00069	1.21544	7.2264	4.72697	11.6699	0.993483	1.41374	0.574619	1.79577	39.6906	75.5304	8.50255	30.4086	5.52851	1.01332	5.25743	0.558688	2.64657	0.451803	1.35363	0.169339	0.993596	0.144604
BKHT-20	40	4.57028	10.8813	130.424	102.956	16.329	49.5439	42.0001	104.784	17.883	172.431	59.0177	24.346	237.418	6.32246	1.14066	0.0614696	11.1239	473.774	4.99792	11.7181	35.5611	12.1929	1.68662	7.22921	2.92168	3.26808	1.12053	8.44391	4.48021	13.0667	1.22851	1.57879	0.606286	2.07807	35.5611	67.1154	7.48144	28.2325	4.62068	0.902737	4.48445	0.478753	2.58774	0.421217	1.13321	0.151986	1.02609	0.163403
BKHT-25	50	5.30306	12.152	143.749	108.67	16.5701	54.9257	52.3825	116.667	19.9359	182.197	68.8032	24.1456	236.84	7.61409	1.3591	0.0604899	11.1536	535.935	4.87157	12.9455	37.4022	12.2507	1.72173	7.11536	2.64809	3.07786	1.00813	8.87044	4.43597	13.5432	1.09901	1.51193	0.557681	1.97848	37.4022	70.9908	7.67842	29.3822	5.56125	0.971102	5.09604	0.482753	2.64657	0.422783	1.22186	0.148518	0.92541	0.199555
BKHT-30	60	6.03584	9.02431	137.828	104.935	14.3606	57.9681	42.0831	123.837	19.0641	214.53	60.5951	25.6904	269.104	7.1619	1.84942	0.143429	10.5156	527.655	5.08813	13.5138	40.2129	12.7702	1.92301	6.64074	3.5404	4.45607	1.41509	8.21714	5.33551	16.8013	1.10796	1.52269	0.605689	1.81021	40.2129	76.6421	8.44441	31.4624	6.14195	1.13397	5.33394	0.577071	2.84032	0.436117	1.3752	0.148516	1.24039	0.169188
BKHT-35	70	6.76862	12.7059	133.134	111.651	17.0521	67.7373	39.9151	123.739	22.9167	191.997	71.1765	26.7868	256.997	12.7924	1.55819	0.122939	11.3943	565.311	8.59025	13.7133	42.7674	13.0768	2.06684	6.32693	2.69748	3.36596	1.02919	8.53812	4.60124	15.0483	0.98863	1.67727	0.591663	1.64829	42.7674	80.8947	9.09196	34.0148	5.35675	1.02538	5.24047	0.558696	2.96487	0.495732	1.2602	0.195713	1.36071	0.185095
BKHT-40	80	7.5014	10.8488	150.205	116.211	17.253	63.1742	40.9994	116.372	22.2418	190.288	60.228	23.7643	282.815	16.6308	1.55819	0.102449	12.2266	546.337	4.79944	11.8066	33.6395	10.8266	1.6171	6.69506	3.15945	3.10075	0.997952	10.7339	3.76511	11.6986	0.940427	1.54737	0.575433	1.83953	33.6395	63.991	7.28464	25.8446	4.56343	0.834371	4.30611	0.45238	2.41131	0.418858	1.18353	0.166561	0.92541	0.137376
BKHT-45	90	8.12128	11.1094	158.966	116.082	17.5645	67.7963	41.7289	127.667	23.17	200.522	57.9176	24.9089	290.986	16.1281	1.43685	0.0809798	12.7758	575.434	12.2487	11.9973	35.2971	10.6461	1.68528	6.3171	3.46219	3.17723	0.958294	10.9037	3.63668	12.0574	0.918521	1.46046	0.60644	1.71221	35.2971	67.2969	7.39066	27.4252	4.71881	0.882634	4.19566	0.476357	2.50126	0.431407	1.22425	0.15407	1.04231	0.177866
BKHT-50	100	8.66591	12.2824	163.275	114.893	18.7395	72.5347	44.064	137.195	19.0641	192.208	58.2639	22.8299	295.854	9.67762	0.849425	0.102449	11.8167	554.651	5.57527	11.6151	33.9313	10.7117	1.65615	6.46781	3.29893	2.76259	0.872116	10.726	3.42965	10.8641	0.786861	1.40736	0.604366	1.58398	33.9313	64.0232	7.15086	24.9416	4.82512	0.878601	4.09376	0.390832	2.30751	0.37807	1.15956	0.171421	1.09102	0.177864
BKHT-55	110	9.21054	11.0769	159.209	115.061	16.309	62.18	38.3731	113.524	22.5792	193.953	60.4136	22.5343	287.548	6.06335	1.67955	0.0819595	12.5687	553.299	5.07007	11.537	35.2242	11.3889	1.75018	6.50726	3.21043	3.17998	1.02817	10.1029	4.18993	12.9588	0.90601	1.44541	0.559499	1.85045	35.2242	66.6586	7.36415	27.2204	4.57162	0.838394	4.59066	0.4268	2.26945	0.40317	1.16436	0.142965	1.03256	0.161957
BKHT-60	120	9.75517	11.2723	149.251	109.154	16.7108	73.2948	44.669	118.141	19.6266	181.263	57.4114	20.1507	229.362	16.1381	0.946521	0.143429	11.5971	540.76	4.90767	11.6262	33.9671	10.3176	1.57539	6.54923	3.15727	3.01332	0.915301	10.5794	3.70452	12.1959	0.687318	1.46268	0.606688	1.48924	33.9671	63.6352	7.22654	26.3442	4.30991	0.854483	4.30184	0.432399	2.24177	0.366305	0.991857	0.134637	0.873454	0.121467
BKHT-65	130	11.2065	11.4678	137.73	104.802	12.9144	49.0176	39.5195	111.266	19.0362	132.603	71.1302	24.6129	250.168	7.02172	0.995056	0.163919	10.4734	522.271	4.7453	11.801	34.9513	9.07762	1.63498	5.55214	1.86422	3.04777	0.878773	10.3995	4.68203	16.2383	1.25531	1.52185	0.528471	2.13806	34.9513	66.995	7.63549	27.4662	4.93966	0.836379	4.73931	0.418007	2.43552	0.426705	1.17394	0.178362	1.02283	0.161957
BKHT-66	132	11.6176	8.50312	125.503	62.9278	14.8226	46.3849	35.1413	100.266	18.3329	158.648	88.1458	24.8798	429.113	18.0971	1.70382	0.0909798	10.2157	508.038	6.98269	13.1273	36.7277	11.2793	1.82041	6.19605	1.79984	4.31933	1.32649	5.57905	4.56572	14.8669	1.34094	1.00281	0.51741	1.35664	36.7277	68.9441	7.63417	28.1026	5.17686	0.868561	5.08758	0.474759	2.47704	0.428273	1.30332	0.169338	1.25013	0.161958
BKHT-67	134	12.0288	15.799	81.2296	91.1635	12.1913	33.5743	28.7415	91.4267	16.8708	128.588	64.8741	23.1168	154.511	14.9343	1.21841	0.102449	7.74475	451.517	3.10341	23.5536	33.6254	8.69236	1.52981	5.68198	1.98211	5.79851	1.49895	10.4878	4.27797	16.5488	1.72132	2.24459	0.630485	2.71528	33.6254	63.3098	6.8871	27.2407	4.31806	0.896702	4.3783	0.4324	2.48423	0.414154	1.04935	0.156845	1.01633	0.105561
BKHT-69	138	12.8511	17.9166	79.5262	93.2402	13.8986	39.8332	34.37	117.062	16.2241	157.848	58.1686	22.7441	142.356	12.9213	1.26697	0.143429	8.53457	465.302	3.13945	17.8231	36.1053	9.90072	1.67272	5.91892	2.71363	4.56069	1.25062	9.41752	4.27413	15.5866	1.42746	2.34489	0.536745	2.34076	36.1053	69.4702	7.60263	28.2601	4.85784	0.842413	4.73934	0.460368	2.44245	0.405523	1.07331	0.143659	0.918916	0.150389
BKHT-70	140	13.2622	19.7086	128.488	100.392	13.2358	51.4742	38.81	101.935	18.0237	154.502	61.0066	22.153	199.759	17.3197	1.80089	0.0614696	9.4089	490.886	3.64464	11.8489	36.0013	9.76289	1.50122	6.5033	2.53254	3.70819	1.00559	10.2831	4.42567	16.3199	1.07593	1.56268	0.637129	1.95035	36.0013	67.9315	7.57488	27.3087	4.45709	0.94094	4.57367	0.460375	2.34209	0.372578	1.15237	0.138107	0.92541	0.108453
BKHT-72	144	14.0846	19.3176	131.666	98.3567	13.1152	47.8473	34.5783	108.123	19.6829	156.277	61.9828	21.1422	201.592	7.63409	1.65528	0.0614696	10.0636	506.776	3.73484	12.0397	35.1329	9.45617	1.58334	5.97228	2.5213	3.7706	1.01487	10.4013	4.32604	16.0727	1.10467	1.49403	0.553641	2.05564	35.1329	67.2026	7.7995	27.6855	5.10324	0.858501	4.40379	0.460371	2.31096	0.403957	1.0829	0.163787	0.850726	0.121468
BKHT-73	146	14.4957	19.1058	122.431	95.3629	13.3462	48.3445	35.0268	112.199	18.9658	152.396	68.118	23.6503	214.248	16.2226	1.60673	0.112694	9.42792	512.69	3.77996	13.143	37.5385	10.3774	1.77106	5.85944	2.23723	4.12249	1.13965	9.18945	4.66533	16.876	1.22301	1.55782	0.569141	1.97257	37.5385	72.189	8.32267	30.0769	5.36498	0.965068	5.00904	0.727781	2.58949	0.4471	1.2015	0.187452	1.19851	0.146776
BKHT-74	148	14.9069	18.894	113.196	92.369	13.5772	48.8416	35.4752	116.275	18.2487	148.515	74.2533	26.1584	226.905	14.8111	1.55819	0.163919	8.79224	518.604	3.82507	14.2464	39.9441	11.2987	1.95878	5.76824	2.00011	4.49113	1.27037	8.1752	4.99308	17.652	1.33894	1.63202	0.582902	1.89119	39.9441	77.1755	8.84583	32.4683	5.62672	1.07163	5.61429	0.995191	2.86802	0.490243	1.3201	0.211118	1.5463	0.172083
BKHT-75	150	15.318	19.0895	114.035	97.7267	12.8944	43.109	27.5325	93.1943	18.0516	151.774	68.0374	22.9251	211.488	13.7327	0.679549	0.143429	9.22307	502.856	3.89725	12.7084	38.2687	10.6666	1.70385	6.26032	2.23074	4.21023	1.17352	9.1619	4.96339	17.8072	1.32949	1.71398	0.612656	2.26697	38.2687	71.3619	7.8008	28.6156	5.47126	1.02137	4.7478	0.516322	2.64311	0.393757	1.09248	0.154069	0.928656	0.147496
BKHT-80	160	16.61	19.2216	127.583	103.328	14.5213	59.021	34.6618	120.204	19.4015	159.39	68.8035	21.0947	214.289	19.2221	1.38334	0.0604899	9.08789	549.096	4.47466	15.2026	34.3281	11.0319	1.57273	7.01448	2.3166	3.57182	1.04381	10.2999	4.14505	14.1839	0.893526	1.61978	0.562691	1.75069	34.3281	65.627	7.47897	25.9474	4.87422	0.860508	4.48447	0.442785	2.18295	0.364735	1.02779	0.138108	0.951394	0.125808
BKHT-85	170	16.7563	15.6378	123.021	98.325	14.7221	48.0816	36.3504	110.479	18.3894	145.579	63.5528	21.2091	209.172	9.97619	1.04359	0.0614696	7.71096	495.556	4.14985	13.5154	35.1471	10.8766	1.54625	7.03418	2.29068	4.49514	1.26317	9.95535	4.02521	14.3242	1.10277	1.59851	0.588238	2.04496	35.1471	67.2962	7.48026	28.3695	5.19322	0.942945	4.62462	0.516321	2.37325	0.407097	1.17395	0.149212	0.766303	0.140268
BKHT-90	180	16.9025	16.8106	119.713	96.3517	15.2242	48.4325	32.5563	109.105	19.8233	148.708	69.5573	20.0172	196.329	16.4363	1.55821	0.163919	7.80815	533.302	3.5003	14.6177	34.0625	9.74707	1.63431	5.96404	2.13792	4.05251	1.15964	9.88519	3.84141	13.4243	1.03325	1.60971	0.586669	1.9894	34.0625	66.2383	7.45113	25.7694	4.52255	0.898713	4.84975	0.39403	2.25561	0.418075	1.01821	0.143659	0.987109	0.0997775
BKHT-95	190	17.313	14.9211	116.938	96.9085	14.7222	38.137	29.3671	99.6761	17.9394	145.27	72.3257	25.1088	202.946	13.616	1.67955	0.122939	8.30225	516.906	3.75289	13.7635	37.5646	10.3855	1.6694	6.2211	2.00855	5.0351	1.39206	9.33114	4.23259	15.3094	1.64596	1.65743	0.62991	2.54106	37.5646	72.0714	8.14151	28.2805	4.95599	1.02941	5.03657	0.490747	2.51854	0.447884	1.33926	0.159622	1.07154	0.183648
BKHT-100	200	17.7234	13.1618	85.8776	85.7279	11.9704	30.006	23.5929	94.8634	13.9744	105.457	55.3724	20.227	157.176	13.4452	1.48538	0.0709798	5.91598	404.821	3.08531	13.0333	29.0875	7.15784	1.27348	5.62068	1.9045	4.42	1.08767	11.9768	3.58777	14.5797	1.68524	1.99651	0.636755	2.85702	29.0875	54.3506	6.1225	22.7867	3.8519	0.77205	3.56713	0.394032	2.23831	0.361597	0.936745	0.136025	0.85398	0.101222
BKHT-105	210	18.1339	19.9384	137.182	110.826	17.6748	84.06	41.3746	120.007	21.0325	136.137	74.2409	20.9039	225.105	9.67959	1.55819	0.102449	9.17653	567.167	4.0055	14.5952	43.4852	11.6543	1.92897	6.04172	1.83372	4.36195	1.16903	9.50942	3.95624	14.7617	0.621695	1.61575	0.537095	1.31841	43.4852	82.6345	9.09698	33.9326	5.98654	1.03342	5.77994	0.538706	2.42861	0.393758	1.17155	0.147824	0.818255	0.112791
BKHT-110	220	18.5443	19.6778	129.954	104.804	14.4007	53.1121	39.2483	139.946	19.3453	120.054	66.2579	24.7943	324.804	15.243	1.65526	0.0614696	9.66242	521.37	5.59367	13.0189	37.3566	10.5317	1.80153	5.84597	1.81192	3.79684	1.07041	9.95126	4.38799	15.5645	1.16708	1.61293	0.533057	1.97325	37.3566	70.224	8.01787	29.2317	5.40583	0.876595	4.67558	0.513924	2.76421	0.411801	1.1955	0.172114	1.07155	0.150391
BKHT-115	230	18.9548	20.3294	125.084	98.2527	15.2846	48.5492	43.4389	103.409	17.9675	139.549	70.5864	20.9708	188.168	16.4206	1.60672	0.0819595	9.18079	490.866	3.2838	13.3172	34.4924	9.10776	1.5575	5.84767	1.97699	3.39335	0.89602	10.7878	3.57528	13.5401	1.07987	1.57099	0.644706	2.02378	34.4924	66.0066	7.28588	26.6247	4.727	0.969088	4.46749	0.450779	2.36979	0.370225	1.00143	0.145047	0.857217	0.130144
BKHT-125	250	19.7757	15.7681	111.808	97.5966	13.0952	43.6939	51.6949	100.463	18.2206	145.689	67.4197	25.5664	209.461	14.7251	1.84942	0.0809798	8.94424	485.287	4.11375	13.9949	36.307	10.0441	1.7045	5.89271	2.16092	4.60511	1.27398	9.71679	4.60206	16.6353	1.46282	1.74578	0.578605	2.23365	36.307	68.2271	7.64171	27.3843	4.80061	0.914796	4.8667	0.501139	2.6085	0.421998	1.23144	0.167951	1.07478	0.140265
BKHT-130	260	20.1862	18.3745	124.987	100.262	14.9834	51.7084	35.0791	107.828	18.783	155.211	58.5353	25.9193	226.844	15.0898	1.04359	0.143429	9.97494	471.206	4.16793	12.6183	36.1155	10.0528	1.70118	5.90933	2.65158	3.93105	1.09421	9.97354	4.02559	14.4623	1.25315	1.60436	0.541622	1.93899	36.1155	67.0229	7.49914	28.0342	4.84148	0.824325	4.47171	0.486749	2.58429	0.432983	1.21946	0.167256	0.996856	0.159065
BKHT-145	290	21.3731	16.2894	115.309	96.9082	15.9675	44.7473	37.7473	128.551	15.8585	140.995	66.6654	24.5556	177.789	15.5824	0.873717	0.102449	8.42056	481.957	4.09573	18.0696	35.1613	10.8636	1.7899	6.06939	2.11497	4.31707	1.33382	8.92044	4.08214	13.2123	1.37191	1.68084	0.607781	2.16568	35.1613	66.9686	7.74141	27.9109	4.76789	0.979135	5.08759	0.511525	2.49433	0.414153	1.12363	0.146437	0.980615	0.157619
BKHT-150	300	21.5608	11.4676	83.4272	113.491	11.8498	34.9197	30.4506	86.6139	14.3401	110.909	81.8664	18.3583	391.175	11.5708	1.67955	0.143429	5.65413	428.08	6.54964	14.2248	28.1304	9.51099	1.36683	6.95841	1.35475	4.90608	1.65876	1.41845	4.81575	14.2435	1.31432	0.323417	0.678217	3.25005	28.1304	53.5241	5.99378	21.7741	3.55748	0.792149	3.58412	0.370049	1.88197	0.325515	0.94873	0.127696	0.837739	0.127252
BKHT-155	310	21.7486	19.4172	136.103	134.336	17.1526	58.3771	42.0627	120.792	20.0345	169.301	86.7365	18.7111	388.999	15.6625	1.75238	0.143429	8.95276	551.683	6.56764	24.1043	33.0483	10.3511	1.51116	6.84975	1.9519	3.40402	1.06618	3.31711	3.62082	11.5603	0.801306	0.504557	0.723451	2.30117	33.0483	61.5722	6.69912	25.5231	4.44894	0.997239	3.99182	0.418807	1.98921	0.370226	0.987059	0.136025	0.912426	0.135928
BKHT-160	320	21.9364	21.5673	137.313	92.2809	18.4383	59.0796	45.0021	113.328	19.1485	163.556	86.9834	24.8991	454.578	13.0811	1.84942	0.0704899	10.5283	548.406	6.91051	13.22	37.2873	11.3316	1.69125	6.70013	1.88031	3.45776	1.05081	3.73125	3.68741	12.1337	1.05363	0.615835	0.621314	1.56197	37.2873	68.3611	7.59133	27.9657	5.19319	0.993216	4.59916	0.482751	2.54622	0.448668	1.2602	0.163786	1.19169	0.19666
BKHT-170	340	22.312	19.417	134.925	83.0086	17.4339	55.5109	42.3753	143.678	20.5265	164.944	88.8875	22.3341	423.215	11.5433	1.1892	0.0614696	9.78491	545.672	6.80226	13.6527	38.4509	11.9101	1.80251	6.60749	1.85565	3.96054	1.22676	4.45075	4.09893	13.2332	1.00584	0.785749	0.630239	1.49536	38.4509	73.1302	8.16551	29.964	4.86601	0.999251	4.82851	0.475559	2.43206	0.405521	1.0829	0.158233	1.07154	0.130143
BKHT-175	350	22.4998	18.6352	128.133	79.8653	16.5901	60.0154	42.7709	112.346	18.9236	149.305	88.8753	24.6701	437.952	12.095	1.16496	0.102449	10.3762	498.633	7.07319	14.1379	40.4423	12.9324	1.87268	6.90585	1.67994	4.34042	1.38796	4.62907	4.67716	14.6264	1.02766	0.934426	0.562616	1.33075	40.4423	75.4446	8.3902	31.5239	5.4549	0.979139	5.1895	0.525915	2.69155	0.432981	1.31051	0.162397	1.23064	0.212572
BKHT-185	370	22.8754	24.2388	161.613	85.2113	24.2032	73.5876	49.7352	129.239	20.8919	188.528	92.1258	26.8442	510.94	18.2307	1.16493	0.102449	12.3618	596.061	8.86004	14.9592	39.7393	12.4801	1.97598	6.3159	2.04642	3.27898	1.02976	5.22522	3.09383	9.85141	0.91198	0.807006	0.491461	1.15796	39.7393	75.7469	8.52522	30.7507	5.79843	0.888657	5.2702	0.516324	2.61544	0.454944	1.26739	0.179748	1.30208	0.20534
BKHT-200	400	23.4387	26.4542	203.181	88.7656	28.9642	97.8678	69.481	222.361	26.1225	227.799	82.6699	28.9514	546.77	21.5274	1.69883	0.0819595	16.2529	617.812	8.9314	15.4684	40.9137	12.8908	1.85479	6.95002	2.75552	3.09317	0.974578	5.33445	2.67036	8.47535	0.739554	0.676891	0.610518	0.906994	40.9137	74.0337	8.23743	29.6148	5.38949	1.05957	5.22351	0.527512	2.87492	0.51064	1.60282	0.189466	1.53981	0.209677
[truncated: 3 more columns]

## Sheet: Supp_4 (Grain Size)
Supplementary Table 4. Grain size distribution of Bakhira Lake sediments
Sample id	Age (kyr)	Clay%	Silt%	Sand%	Mean(mm)	EM1	EM2
BKHT-1	0.255834	13.35	54.71	31.95	24.79	35.9246	64.0754
BKHT-2	0.511668	18.08	65.94	15.97	15.07	60.5478	39.4522
BKHT-3	0.767502	12.35	63.01	24.65	21.9	26.1527	73.8473
BKHT-4	1.02334	19.69	69.65	10.66	12.75	68.6056	31.3944
BKHT-5	1.27917	20.6	67.51	11.89	12.54	66.6807	33.3193
BKHT-6	1.535	11.14	67.61	21.25	23.1	22.3134	77.6866
BKHT-7	1.79084	20.01	70.75	9.25	12.35	70.0124	29.9876
BKHT-8	2.04667	10.9	53.82	35.29	28.57	73.8258	26.1742
BKHT-9	2.30251	15.72	62.97	21.31	18.02	44.3059	55.6941
BKHT-10	2.55834	10.42	51.86	37.72	29.58	41.0191	58.9809
BKHT-11	2.81417	19.71	77.19	3.09	10.83	84.7436	15.2564
BKHT-12	3.07001	10.65	52.34	37.01	29.13	39.5201	60.4799
BKHT-13	3.32584	9.74	52.04	38.21	31.04	43.8445	56.1555
BKHT-14	3.58168	9.53	42.98	47.49	40.51	36.865	63.135
BKHT-15	3.83751	8.68	45.02	46.3	43.93	27.1185	72.8815
BKHT-16	3.98406	12.52	60.26	27.22	22.73	31.1716	68.8284
BKHT-17	4.13061	12.92	63.75	23.33	20.42	38.1801	61.8199
BKHT-18	4.27717	26.26	73.74	0	7.83	100	0
BKHT-19	4.42372	13.6	61.71	24.69	20.54	46.6928	53.3072
BKHT-20	4.57028	11.64	63.62	24.74	22.68	26.8446	73.1554
BKHT-21	4.71684	14.55	68.65	16.81	17.08	49.04	50.96
BKHT-22	4.86339	14.4	66.73	18.87	17.5	60.0568	39.9432
BKHT-23	5.00995	16.35	69.89	13.75	14.69	63.2929	36.7071
BKHT-24	5.1565	15.14	67.19	17.67	16.52	60.0375	39.9625
BKHT-25	5.30306	13.5	66.07	20.42	18.77	44.2056	55.7944
BKHT-26	5.44962	13.91	69.31	16.78	17.7	47.3415	52.6585
BKHT-27	5.59617	14.53	68.16	17.31	17.38	52.4444	47.5556
BKHT-28	5.74273	17.84	77.6	4.56	11.75	81.5934	18.4066
BKHT-29	5.88928	22.12	74.46	3.42	10.19	83.0237	16.9763
BKHT-30	6.03584	19.62	77.86	2.52	10.27	91.4529	8.5471
BKHT-31	6.1824	11.87	70.38	17.75	20.24	36.9194	63.0806
BKHT-32	6.32895	18.65	76.06	5.28	11.3	83.015	16.985
BKHT-33	6.47551	19.41	76.32	4.27	10.66	87.3438	12.6562
BKHT-34	6.62206	21.95	75.52	2.52	9.28	96.2116	3.7884
BKHT-35	6.76862	20.05	78.59	1.36	9.77	96.093	3.907
BKHT-36	6.91518	15.71	59.87	24.42	18.47	48.872	51.128
BKHT-37	7.06173	12.41	76.09	11.5	18.16	48.0817	51.9183
BKHT-38	7.20829	16.17	67.11	16.73	15.57	50.9714	49.0286
BKHT-39	7.35484	22.04	76.36	1.59	8.93	99.8787	0.1213
BKHT-40	7.5014	19.79	74.86	5.34	10.39	88.9372	11.0628
BKHT-41	7.64796	21.41	73.25	5.34	9.68	91.7189	8.2811
BKHT-42	7.79448	16.46	64.55	18.99	16.16	48.0714	51.9286
BKHT-43	7.90343	17.22	70.16	12.62	13.8	59.7216	40.2784
BKHT-44	8.01235	18.12	65.46	16.42	14.24	55.457	44.543
BKHT-45	8.12128	27.07	72.93	0	7.11	100	0
BKHT-46	8.2302	22.99	75.26	1.76	8.33	100	0
BKHT-47	8.33913	22.31	73.68	4.02	8.94	97.4272	2.5728
BKHT-48	8.44806	21.96	74.15	3.89	9.12	96.4211	3.5789
BKHT-49	8.55698	23.68	73.71	2.6	8.25	70	30
BKHT-50	8.66591	17.81	73.05	9.13	11.96	78.3813	21.6187
BKHT-51	8.77483	24.56	74.83	0.62	7.87	100	0
BKHT-52	8.88376	25.13	73.51	1.36	7.53	100	0
BKHT-53	8.99269	27.86	72.14	0	6.73	100	0
BKHT-54	9.10161	18.34	72.78	8.88	11.98	78.8908	21.1092
BKHT-55	9.21054	20.2	77.52	2.28	9.76	95.1053	4.8947
BKHT-56	9.31946	18.29	73.15	8.56	11.94	79.5096	20.4904
BKHT-57	9.42839	20.62	74.23	5.15	9.85	91.8045	8.1955
BKHT-58	9.53732	20.38	75.86	3.76	9.56	96.5009	3.4991
BKHT-59	9.64624	20.85	77.62	1.53	8.97	100	0
BKHT-60	9.75517	24.65	74.38	0.97	7.58	100	0
BKHT-61	9.86409	25.62	73.42	0.96	7.8	100	0
BKHT-62	9.97302	23.18	75.03	1.79	8.26	100	0
BKHT-63	10.3842	22.11	76.37	1.52	8.56	100	0
BKHT-64	10.7953	21.22	76.62	2.15	9.07	100	0
BKHT-65	11.2065	21.97	76.51	1.52	8.8	100	0
BKHT-66	11.6176	18.44	76.64	4.92	11.19	84.4872	15.5128
BKHT-67	12.0288	21.03	76.74	2.24	9.3	97.421	2.579
BKHT-68	12.4399	22.58	76.07	1.34	8.71	100	0
BKHT-69	12.8511	10.64	52.63	36.74	28.92	10.0954	89.9046
BKHT-70	13.2622	12.84	40.61	46.55	33.69	25.6759	74.3241
BKHT-71	13.6734	8.74	33.22	58.04	51.36	9.9168	90.0832
BKHT-72	14.0846	8.51	55.02	36.46	33.28	3.2253	96.7747
BKHT-73	14.4957	9.24	43.32	47.44	37.41	3.0929	96.9071
BKHT-74	14.9069	10.47	66.44	23.09	24.19	23.5493	76.4507
BKHT-75	15.318	13.05	77.85	9.1	16.58	57.3864	42.6136
BKHT-76	15.7292	19.36	71.28	9.35	12.5	63.3075	36.6925
BKHT-77	16.1403	17.04	75.75	7.2	12.99	66.6164	33.3836
BKHT-78	16.5515	15.46	79.15	5.39	11.84	86.0032	13.9968
BKHT-79	16.5807	15.51	78.52	5.97	11.92	84.0156	15.9844
BKHT-80	16.61	15.71	79.46	4.83	11.73	86.7804	13.2196
BKHT-81	16.6393	13.16	67.27	19.57	19.37	38.9086	61.0914
BKHT-82	16.6685	17.39	76.54	6.08	12.5	70.1547	29.8453
BKHT-83	16.6977	19.38	74.19	6.43	11.36	73.8264	26.1736
BKHT-84	16.727	18.59	75.04	6.37	11.55	75.1415	24.8585
BKHT-85	16.7563	16.57	67.57	15.85	15.9	45.8887	54.1113
BKHT-86	16.7855	13.55	63.66	22.79	20.42	33.0281	66.9719
BKHT-87	16.8148	16.08	73.38	10.55	14.59	56.5104	43.4896
BKHT-88	16.844	15.53	74.95	9.52	14.03	63.4695	36.5305
BKHT-89	16.8732	15.46	71.51	13.03	15.46	50.8905	49.1095
BKHT-90	16.9025	12	53.06	34.94	27.19	21.4297	78.5703
BKHT-91	16.9846	17.2	75.16	7.63	13.14	64.258	35.742
BKHT-92	17.0667	15.27	77.34	7.39	12.84	77.8843	22.1157
BKHT-93	17.1488	15.57	54.27	30.16	22.06	27.1519	72.8481
BKHT-94	17.2309	12.62	55.16	32.22	25.12	30.6239	69.3761
BKHT-95	17.313	7.92	40.91	51.17	45.44	6.8452	93.1548
BKHT-96	17.3951	8.37	41.58	50.05	40.65	0	100
BKHT-99	17.6413	12.85	76.2	10.95	15.08	67.8872	32.1128
BKHT-100	17.7234	9.66	45.83	44.52	34.72	2.2238	97.7762
BKHT-101	17.8055	13.37	73.27	13.36	15.66	62.431	37.569
BKHT-102	17.8876	18.12	74.67	7.21	12.13	69.8412	30.1588
BKHT-103	17.9697	16.49	73.7	9.81	13.49	64.1715	35.8285
BKHT-104	18.0518	17.21	76.86	5.93	11.86	76.1542	23.8458
BKHT-105	18.1339	17.43	73.76	8.8	12.79	67.4874	32.5126
BKHT-106	18.216	19.58	74.12	6.3	10.9	78.1717	21.8283
BKHT-107	18.2981	19.23	75.59	5.18	10.6	82.6709	17.3291
BKHT-108	18.3802	20.9	73.2	5.9	10.16	81.8384	18.1616
BKHT-109	18.4622	19.1	75.26	5.64	11.15	76.7792	23.2208
BKHT-110	18.5443	16.4	79.51	4.09	10.7	93.1019	6.8981
BKHT-111	18.6264	19.74	76.94	3.32	10.08	86.3233	13.6767
BKHT-112	18.7085	17.88	80.41	1.71	9.42	100	0
BKHT-113	18.7906	21.97	74.48	3.54	9.14	91.3701	8.6299
BKHT-114	18.8727	18.93	80.15	0.92	9.21	100	0
BKHT-115	18.9548	16.18	74.53	9.29	14.05	60.7235	39.2765
BKHT-116	19.0369	20.02	74.27	5.71	10.7	78.923	21.077
BKHT-117	19.119	18.54	72.88	8.58	12.07	70.2251	29.7749
BKHT-118	19.2011	18.6	72.45	8.96	12.13	70.7215	29.2785
BKHT-119	19.2832	13.56	71.39	15.05	17.7	43.2222	56.7778
BKHT-120	19.3653	14.15	77.64	8.2	13.95	70.3695	29.6305
BKHT-121	19.4474	15.3	72.17	12.53	15.74	51.1373	48.8627
BKHT-122	19.5294	16.54	72.46	11	13.75	62.2683	37.7317
BKHT-123	19.6115	13.02	73.94	13.04	16.84	50.0133	49.9867
BKHT-124	19.6936	18.8	71.12	10.09	12.54	65.5679	34.4321
BKHT-125	19.7757	14.51	79	6.49	12.89	77.8016	22.1984
BKHT-126	19.8578	17.93	66.41	15.66	14.67	52.2516	47.7484
BKHT-127	19.9399	16.54	80.28	3.18	10.96	89.7221	10.2779
BKHT-128	20.022	29.99	70	0.01	7.27	99.956	0.044
BKHT-129	20.1041	20.98	70.94	8.08	11.14	72.5599	27.4401
BKHT-130	20.1862	17.83	63.06	19.11	14.88	56.3995	43.6005
BKHT-131	20.2683	19.98	77.7	2.32	9.68	96.2565	3.7435
BKHT-132	20.3504	22.1	72.07	5.83	9.43	86.8718	13.1282
BKHT-133	20.4325	20.24	72.3	7.46	10.92	76.5621	23.4379
BKHT-134	20.5145	18.23	75.73	6.03	11.56	76.1149	23.8851
BKHT-135	20.5966	22.77	71.95	5.28	10.26	81.5683	18.4317
BKHT-136	20.6787	19.17	77.06	3.77	10.57	88.5773	11.4227
BKHT-137	20.7608	17.56	73.34	9.1	13.15	64.4509	35.5491
BKHT-138	20.8429	20.02	77.81	2.18	9.72	95.832	4.168
BKHT-140	21.0071	13.73	76.62	9.65	13.9	73.6146	26.3854
BKHT-141	21.0892	16.43	76.66	6.91	11.61	85.4686	14.5314
BKHT-142	21.1713	22.81	75.41	1.78	8.22	100	0
BKHT-143	21.2534	19.85	72.86	7.29	11.28	73.3949	26.6051
BKHT-144	21.3355	19.2	71.3	9.5	12.17	66.3961	33.6039
BKHT-145	21.3731	22.58	74.22	3.2	8.53	100	0
BKHT-148	21.4857	18.16	69.03	12.8	12.94	65.0179	34.9821
BKHT-149	21.5233	17.16	69.3	13.54	14.12	58.4962	41.5038
BKHT-151	21.5984	18.22	78.85	2.93	10.74	90.5074	9.4926
BKHT-152	21.636	17.74	78.29	3.97	10.42	91.7285	8.2715
BKHT-153	21.6735	17.62	78.6	3.78	11.28	86.813	13.187
BKHT-154	21.7111	16.16	78.39	5.45	11.45	86.3851	13.6149
BKHT-155	21.7486	21.3	75.73	2.97	9.14	98.3999	1.6001
BKHT-156	21.7862	19.04	74.96	5.99	10.81	86.708	13.292
BKHT-157	21.8238	20.86	76.9	2.24	9.49	95.8397	4.1603
BKHT-158	21.8613	21.82	72.54	5.64	9.56	86.387	13.613
BKHT-159	21.8989	21.17	74.29	4.54	9.74	86.4414	13.5586
BKHT-160	21.9364	26.51	73.49	0	7.26	100	0
BKHT-161	21.974	20.44	74.25	5.31	10.47	86.0226	13.9774
BKHT-162	22.0115	17.46	74.87	7.68	13.01	68.6411	31.3589
BKHT-163	22.0491	21.65	75.06	3.29	9.78	90.4263	9.5737
BKHT-164	22.0867	20.77	75.13	4.09	10.14	88.5142	11.4858
BKHT-165	22.1242	21.2	75.33	3.47	9.68	92.3391	7.6609
BKHT-166	22.1618	18.58	69.99	11.44	12.9	62.9634	37.0366
BKHT-167	22.1993	20.17	71.5	8.33	11.48	70.9622	29.0378
BKHT-168	22.2369	20.86	74.52	4.62	10.42	84.8093	15.1907
BKHT-169	22.2745	23.07	74.14	2.79	9.1	93.26	6.74
BKHT-170	22.312	22.65	74.88	2.47	8.44	100	0
BKHT-171	22.3496	21.98	72.3	5.72	9.9	81.5548	18.4452
BKHT-172	22.3871	19.59	75.59	4.82	10.66	80.2835	19.7165
BKHT-173	22.4247	17.54	70.52	11.94	13.7	60.4753	39.5247
BKHT-174	22.4622	15.61	77.96	6.43	12.12	82.5204	17.4796
BKHT-175	22.4998	17.07	77.44	5.49	11.29	85.8606	14.1394
BKHT-176	22.5374	16.59	73.3	10.11	14.16	63.6995	36.3005
BKHT-177	22.5749	18.71	78.15	3.13	11.32	82.8206	17.1794
BKHT-178	22.6125	18.32	71.08	10.61	12.86	64.8169	35.1831
BKHT-179	22.65	19.34	77.01	3.65	10.94	84.6615	15.3385
BKHT-180	22.6876	18.81	75.91	5.28	11.43	81.0469	18.9531
BKHT-181	22.7251	20.12	76.11	3.77	10.97	81.4684	18.5316
BKHT-184	22.8378	19.43	75.01	5.56	11.27	81.1034	18.8966
BKHT-185	22.8754	22.23	74.65	3.12	9.5	91.3917	8.6083
BKHT-186	22.9129	19.61	74.89	5.5	10.94	84.4225	15.5775
BKHT-187	22.9505	23.26	74.94	1.8	8.85	96.2468	3.7532
BKHT-188	22.9881	20.86	74.11	5.03	9.87	84.7432	15.2568
BKHT-189	23.0256	21.46	73.36	5.18	9.86	84.46	15.54
BKHT-190	23.0632	24.95	72.69	2.37	8.19	94.1951	5.8049
BKHT-192	23.1383	16.68	74.3	9.02	13.74	67.0696	32.9304
BKHT-193	23.1758	26.47	71.96	1.57	7.76	100	0
BKHT-194	23.2134	32.54	67.46	0	6.02	100	0
BKHT-195	23.251	26.96	72.05	0.99	7.52	100	0
BKHT-196	23.2885	31.5	68.49	0.01	6.33	100	0
BKHT-197	23.3261	26.73	70.61	2.65	7.89	98.0564	1.9436
BKHT-198	23.3636	28.54	70.62	0.84	7.29	100	0
BKHT-199	23.4012	29.71	69.83	0.47	6.72	100	0
BKHT-200	23.4387	30.39	67.92	1.69	6.7	99.8765	0.1235
BKHT-201	23.4763	30.06	69.57	0.37	6.59	100	0
BKHT-202	23.5139	27.01	70.58	2.4	7.78	100	0
BKHT-203	23.5514	24.07	72.97	2.96	8.77	94.7644	5.2356

## Sheet: Supp_5 (Clay minerals)
Supplementary Table 5. Clay mineral assemblages of Bakhira Lake sediments.
Sample Id	Depth(cm)	Age(kyr)	Kaolinite%	Smectite%	Illite%	Chlorite%	sm/chl+ill	Illite Crystallinity	Illite Chemistry
BKHT-1	2	0.3	8.97	32.31	52.16	6.57	0.55	0.58	0.46
BKHT-5	10	1.3	2.24	32.97	51.76	13.03	0.51	0.42	0.44
BKHT-8	16	2	0.72	8.04	82.9	8.34	0.09	0.31	0.28
BKHT-10	20	2.6	6.53	10.99	75.06	7.42	0.13	0.47	0.23
BKHT-12	24	3.1	6.63	20.11	65.12	8.14	0.27	0.34	0.29
BKHT-14	28	3.6	0.83	30.35	57.21	11.61	0.44	0.33	0.39
BKHT-15	30	3.8	1.19	45.48	44.65	8.67	0.85	0.55	0.61
BKHT-20	40	4.6	1.12	48.88	42.25	7.75	0.98	0.5	0.59
BKHT-25	50	5.3	1.35	28.46	59.76	10.43	0.41	0.31	0.54
BKHT-30	60	6	7.91	46.72	36.79	8.58	1.03	0.29	0.34
BKHT-35	70	6.8	11.62	23.27	57.9	7.2	0.36	0.17	0.48
BKHT-40	80	7.5	0.94	38.63	50.81	9.62	0.64	0.25	0.42
BKHT-45	90	8.1	1.89	28.04	54.06	16.02	0.4	0.21	0.42
BKHT-50	100	8.7	1.34	29.46	55.02	14.18	0.43	0.22	0.4
BKHT-55	110	9.2	2.18	19.65	58.85	19.33	0.25	0.11	0.3
BKHT-60	120	9.8	1.32	5.46	79.62	13.6	0.06	0.12	0.33
BKHT-65	130	11.2	1.85	10.11	74.47	13.56	0.11	0.17	0.3
BKHT-66	132	11.6	1.08	25.13	65.78	8.01	0.34	0.16	0.28
BKHT-67	134	12	0.64	38.15	52.61	8.59	0.62	0.14	0.35
BKHT-69	138	12.9	0.52	44.54	49.56	5.37	0.81	0.3	0.32
BKHT-70	140	13.3	1.36	31.08	54.5	13.06	0.46	0.27	0.35
BKHT-72	144	14.1	0.5	14.54	76.37	8.59	0.17	0.19	0.22
BKHT-73	146	14.5	1.25	17.47	67.86	13.42	0.21	0.19	0.28
BKHT-74	148	14.9	2.69	10.38	82.49	4.44	0.12	0.15	0.31
BKHT-75	150	15.3	5.25	11.97	70.34	12.43	0.14	0.12	0.41
BKHT-80	160	16.6	1.21	15.45	75.47	7.87	0.19	0.12	0.27
BKHT-85	170	16.8	4.33	44.01	45.41	6.24	0.85	0.21	0.21
BKHT-90	180	16.9	7.93	9.61	72.44	10.02	0.12	0.27	0.5
BKHT-95	190	17.3	0.48	42.72	49.13	7.67	0.75	0.21	0.26
BKHT-100	200	17.7	5.34	30.86	52.63	11.17	0.48	0.26	0.25
BKHT-105	210	18.1	5.19	11.48	77.51	5.83	0.14	0.06	0.18
BKHT-110	220	18.5	4.91	12.43	77.81	4.85	0.15	0.15	0.22
BKHT-115	230	19	2.82	10.05	79.05	8.09	0.12	0.13	0.28
BKHT-125	250	19.8	0.72	7.66	80.28	11.33	0.08	0.2	0.26
BKHT-130	260	20.2	1.09	3.74	83.66	11.51	0.04	0.15	0.25
BKHT-145	290	21.4	3.58	9.75	82.49	4.18	0.11	0.19	0.27
BKHT-150	300	21.6	0.66	1.83	89.05	8.45	0.02	0.15	0.26
BKHT-155	310	21.7	2.71	12.58	80.34	4.37	0.15	0.26	0.15
BKHT-160	320	21.9	0.63	10.21	81.6	7.56	0.11	0.14	0.25
BKHT-170	340	22.3	5.5	7.76	80.45	6.28	0.09	0.29	0.19
BKHT-175	350	22.5	2.74	18.74	68.04	10.49	0.24	0.12	0.3
BKHT-185	370	22.9	1.92	6.89	73.9	17.29	0.08	0.15	0.3
BKHT-200	400	23.4	9.51	16.75	67.98	5.76	0.23	0.25	0.21
BKHT-203	406	23.6	8.79	13.78	67.99	9.44	0.18	0.18	0.33
